# Supplementary material for: MicroRNA-140-5p inhibits hepatocellular carcinoma by directly targeting the unique isomerase Pin1 to block multiple cancer-driving pathways
Source: PubMed Central journal article supplement (PMC5382892; doi:10.1038/srep45915), 2017-04-06
Supplement: srep45915-s1.pdf [file srep45915-s1.pdf]

**Title:**

**MicroRNA-140-5p inhibits hepatocellular carcinoma by directly targeting the unique isomerase Pin1 to block multiple cancer-driving pathways**

Xingxue Yan <sup>1,2,\*</sup>, Zhendong Zhu <sup>1,2\*</sup>, Shenmin Xu <sup>1,2\*</sup>, Li-nan Yang <sup>1,2</sup>, Xin-Hua Liao <sup>1,2</sup>, Min Zheng <sup>1,2</sup>, Dayun Yang <sup>1,2</sup>, Jichuang Wang <sup>1,2</sup>, Dongmei Chen <sup>1,2</sup>, Long Wang <sup>1,2</sup>, Jingfeng Liu <sup>3</sup>, Xiaolong Liu <sup>3</sup>, Ruey-Hwa Chen <sup>4</sup>, Xiao Zhen Zhou <sup>1,2,5</sup>, Kun Ping Lu <sup>1,2,5,#</sup> and Hekun Liu <sup>1,2,#</sup>

<sup>1</sup>Fujian Key Laboratory for Translational Research in Cancer and Neurodegenerative Diseases, Institute for Translational Medicine, Fujian Medical University, Fuzhou, Fujian 350122, China.

<sup>2</sup>Key Laboratory of Ministry of Education for Gastrointestinal Cancer, Fujian Medical University, Fuzhou, Fujian 350122, China.

<sup>3</sup>The United Innovation of Mengchao Hepatobiliary Technology Key Laboratory of Fujian Province, Mengchao Hepatobiliary Hospital of Fujian Medical University, Fuzhou 350025, China.

<sup>4</sup>Institute of Biological Chemistry, Academia Sinica, Taipei 115, Taiwan.

<sup>5</sup>Division of Translational Therapeutics, Department of Medicine and Cancer Research Institute, Beth Israel Deaconess Medical Center, Harvard Medical School, Boston, MA 02215, USA

\*These authors contribute equally to the work.

# Correspondence should be addressed to Hekun Liu at [fjlhk@163.com](mailto:fjlhk@163.com) or Kun Ping Lu at [klu@bidmc.harvard.edu](mailto:klu@bidmc.harvard.edu)

**Key Words:** miR-140-5p; Pin1; hepatocellular carcinoma; metastasis

**Supplementary Tables.**

**Table S1.** MiRNA candidates potentially targeting the 3'-untranslated region of Pin1 mRNA were predicted by at least two of the five bioinformatics databases

| Predicted miRNAs | miRnada | PITA | TargetScan |
|------------------|---------|------|------------|
| has-miR-140      |         | √    | √          |
| has-miR-140-5p   | √       | √    | √          |
| has-miR-200b     | √       | √    | √          |
| has-miR-200c     | √       | √    | √          |
| has-miR-429      | √       | √    | √          |
| has-miR-488      | √       | √    |            |
| has-miR-450a     | √       | √    |            |
| has-miR-370      | √       | √    |            |
| has-miR-548a     |         | √    | √          |
| has-miR-876-3p   |         | √    | √          |
| has-miR-1244     |         | √    | √          |

**Table S2.** Clinicopathological characteristics of studied patients and expression of Pin1 and miR-140-5p in HCC

| <b>Factor</b>                  | <b>NO.</b> | <b>(%)</b> |
|--------------------------------|------------|------------|
| <b>Gender</b>                  |            |            |
| Male                           | 22         | 88         |
| Female                         | 3          | 12         |
| <b>Age (years)</b>             |            |            |
| ≤60                            | 16         | 64         |
| >60                            | 9          | 36         |
| <b>Cirrhosis</b>               |            |            |
| Presence                       | 20         | 80         |
| Absence                        | 5          | 20         |
| <b>Tumor size (cm)</b>         |            |            |
| ≤5                             | 9          | 36         |
| >5                             | 16         | 64         |
| <b>Tumor nodule number</b>     |            |            |
| Solitary                       | 18         | 72         |
| Multiple (≥2)                  | 7          | 28         |
| <b>Capsular formation</b>      |            |            |
| Presence                       | 15         | 60         |
| Absence                        | 10         | 40         |
| <b>Edmondson-Steiner grade</b> |            |            |
| I-II                           | 6          | 24         |
| III-IV                         | 19         | 76         |
| <b>Vein invasion</b>           |            |            |
| Presence                       | 18         | 72         |
| Absence                        | 7          | 28         |
| <b>TNM stage</b>               |            |            |
| Stage I                        | 3          | 12         |
| Stage II                       | 8          | 32         |
| Stage III                      | 14         | 56         |
| <b>HBV</b>                     |            |            |
| Negative                       | 2          | 8          |
| Positive                       | 23         | 92         |
| <b>Pin1 expression</b>         |            |            |
| Low expression                 | 9          | 36         |
| High expression                | 16         | 64         |
| <b>MiR-140-5p expression</b>   |            |            |
| Low expression                 | 17         | 68         |
| High expression                | 8          | 32         |

**Table S3.** Sequence of oligonucleotides for plasmid construct, siRNA, qRT-PCR and miRNAs oligonucleotide

| Assay                         |   | Sequence 5' →3'                                     |
|-------------------------------|---|-----------------------------------------------------|
| <b>PCR</b>                    |   |                                                     |
| Pin1                          | F | AAGATGGCGGACGAGGAG                                  |
|                               | R | CACTCAGTGCGGAGGATGAT                                |
| GAPDH                         | F | ACCCACTCCTCCACCTTTG                                 |
|                               | R | CTCTTGTGCTCTTGCTGGG                                 |
| <b>Plasmid construction</b>   |   |                                                     |
| pmirGLO-Pin1-3'UTR-WT         | F | CTAGTTGTTTAAACGAGCTCGGGTGGGGAGC<br>CCAGGCCTG        |
|                               | R | ATGCCTGCAGGTCGACGCAGAGCAGTGGTTC<br>TGGGT            |
| pmirGLO-Pin1-3'UTR-Mut        | F | CTAGTTGTTTAAACGAGCTCGGGTGGGGAGC<br>CCAGGCCTG        |
|                               | R | ATGCCTGCAGGTCGACGCAGAGCTCACCAA<br>CTGGGT            |
| <b>miRNAs oligonucleotide</b> |   |                                                     |
| miRNA-200b mimics             |   | UAAUACUGCCUGGUAUAUGAUGA<br>AUCAUUACCAGGCAGUAUUAUU   |
| miRNA-200c mimics             |   | UAAUACUGCCGGGUAUAUGAUGGA<br>CAUCAUUACCCGGCAGUAUUAUU |
| miRNA-429 mimics              |   | UAAUACUGUCUGGUAUAACCGU<br>GGUUUUACCAGACAGUAUUAUU    |
| miRNA-140-5p mimics           |   | CAGUGGUUUUACCCUAUGGUAG<br>ACCAUAGGGUAAAACCACUGUU    |
| Negative control              |   | UUCUCCGAACGUGUCACGUTT<br>ACGUGACACGUUCGGAGAATT      |

**Supplementary Figures.**

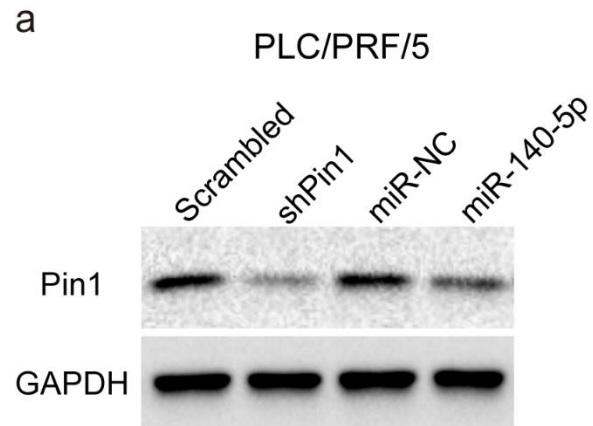

**Figure S1. Effect of miR-140-5p overexpression on the protein levels of Pin1 in PLC/PRF/5 cells.**

(a). Like stable Pin1 knockdown, moderate overexpression of miR-140-5p downregulates Pin1 expression in PLC/PRF/5 cells, as detected by immunoblotting analysis. GAPDH served as loading control.

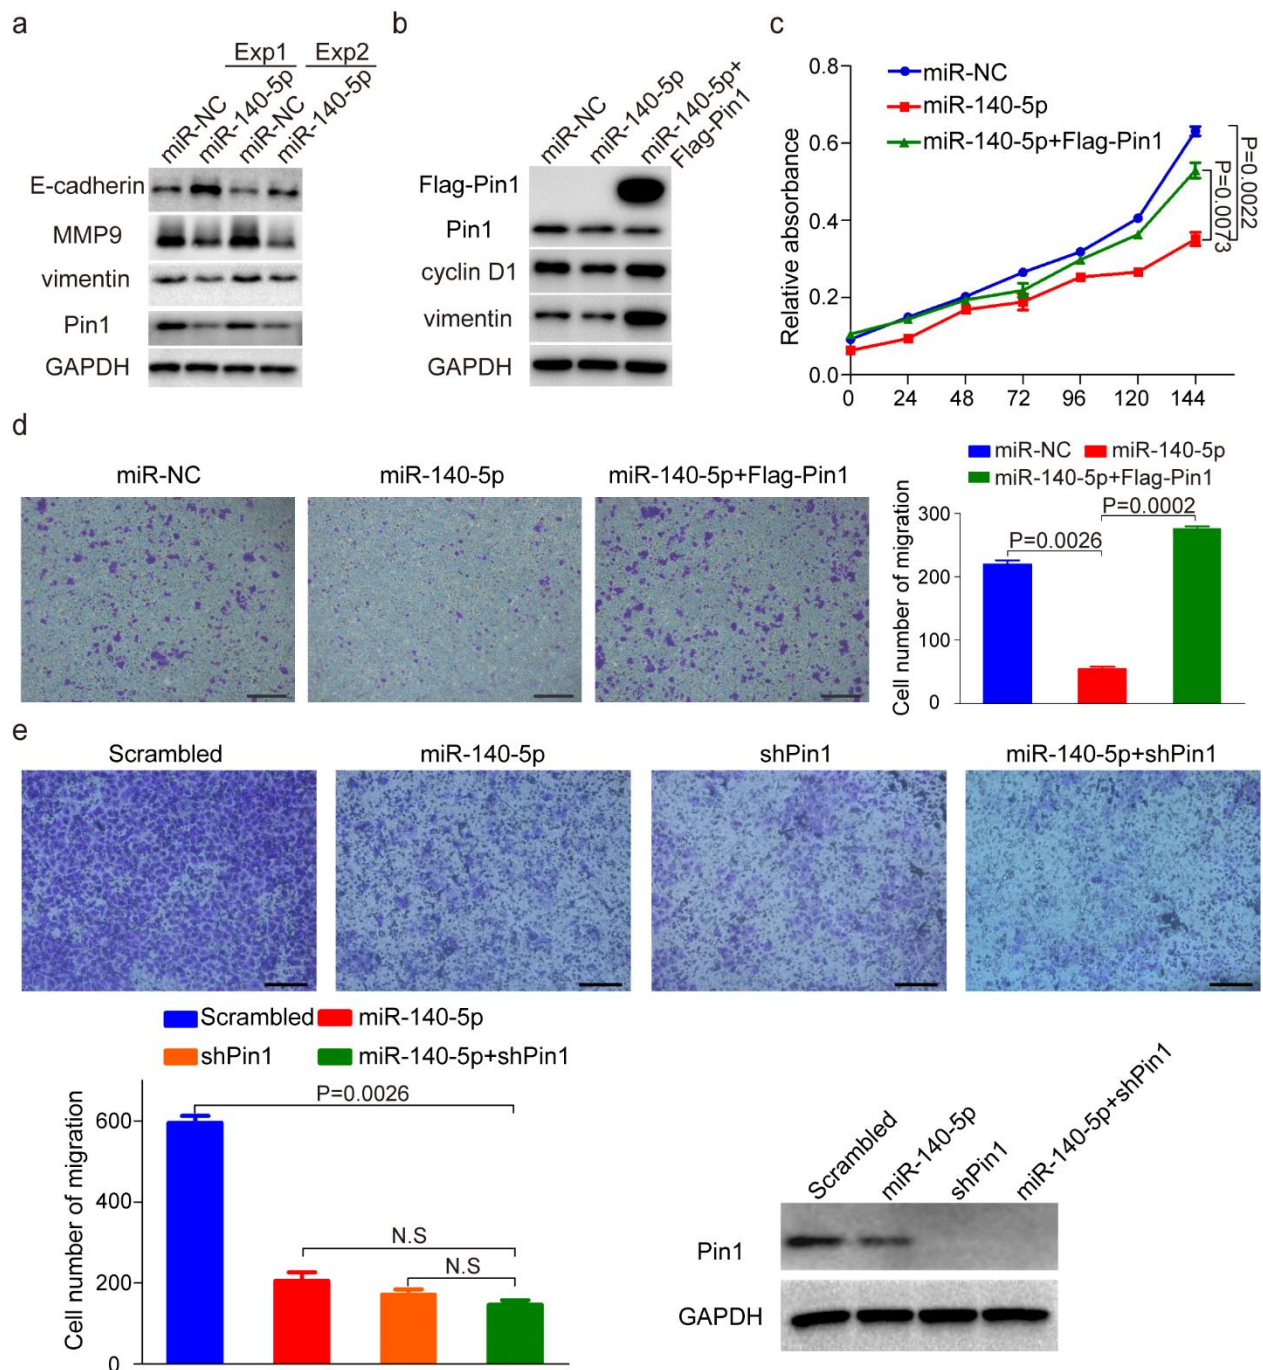

**Figure S2. Effect of Pin1 overexpression or stable Pin1 knockdown on the function of miR-140-5p.**

(a). The protein levels of Pin1 and EMT markers in Huh7 cells after miR-140-5p overexpression were detected by Western blot assay. GAPDH served as loading control.

(b). The protein levels of Pin1, cyclinD1 and vimentin in PLC/PRF/5 cells after co-transfected with miR-140-5p and Flag-Pin1 were detected by Western blot assay. GAPDH served as loading control.

(c). Cell proliferation of PLC/PRF/5 cells with NC, miR-140-5p or miR-140-5p combined with expression of Flag-Pin1 resistant to miR-140-5p was detected by MTT.

(d). Migration of PLC/PRF/5 cells infected with NC, miR-140-5p or miR-140-5p combined with expression of Flag-Pin1 resistant to miR-140-5p were assayed by transwell experiments. Scale bars, 100  $\mu\text{m}$ .

(e). Migration of Huh7 cells infected with Scrambled, miR-140-5p, shPin1 or shPin1 combined with expression of miR-140-5p were assayed by transwell experiments. Scale bars, 100  $\mu\text{m}$ . The protein levels of Pin1 in Huh7 cells were detected by Western blot assay. GAPDH served as loading control.

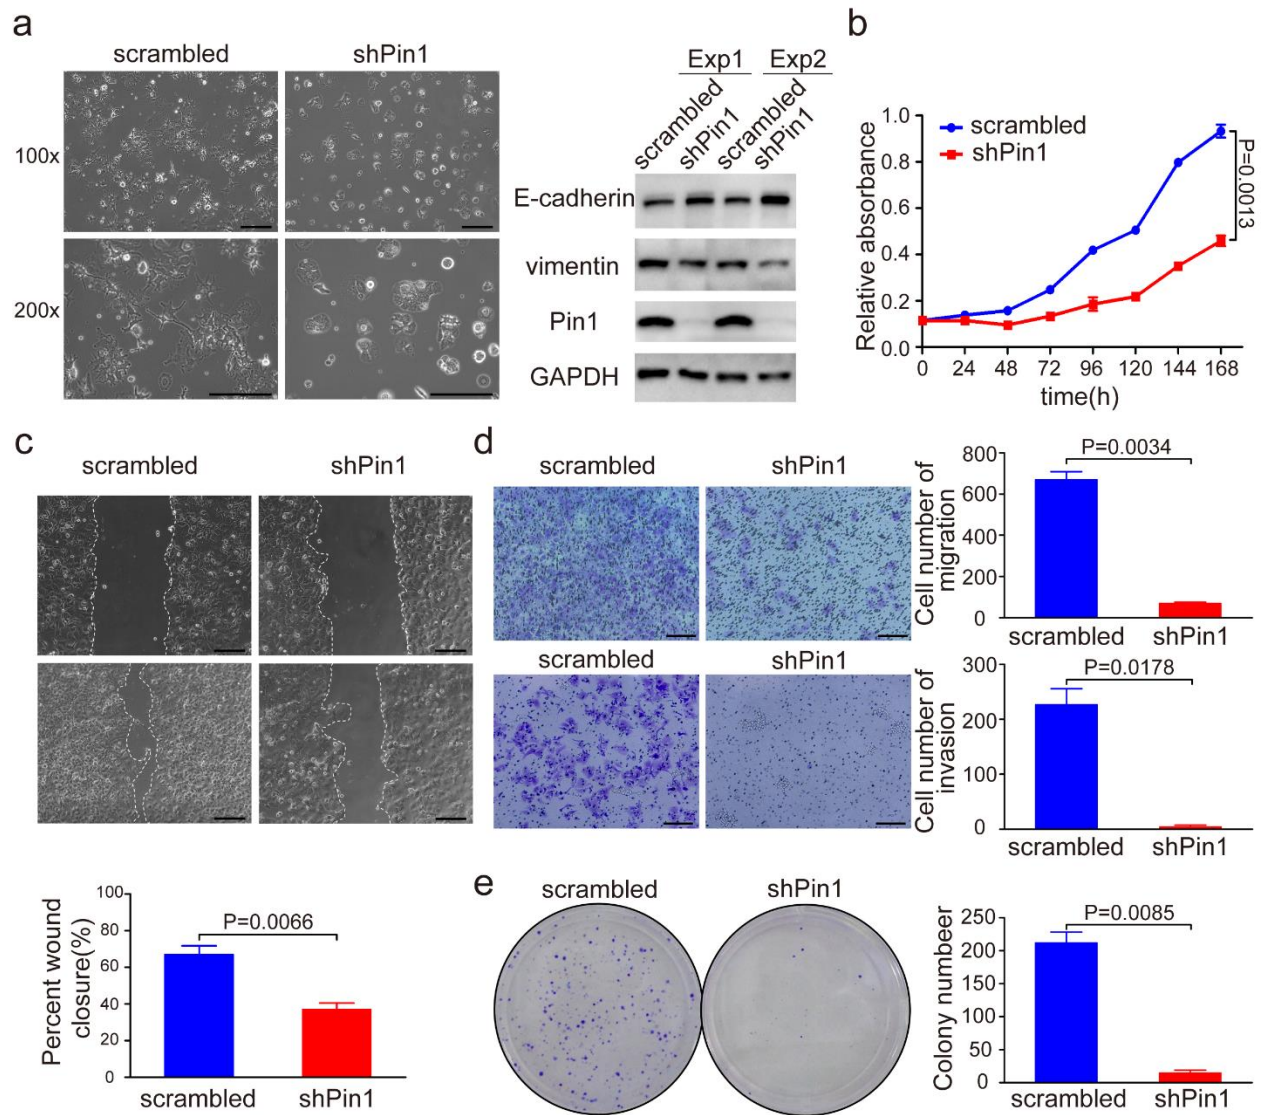

**Figure S3. Stable knockdown of Pin1 inhibits migration, invasion, growth and colony formation of human HCC cells in Huh7.**

(a). Phase-contrast micrographs of indicated Huh7 cells. Scale bars, 100  $\mu$ m. The protein levels of EMT markers and Pin1 in two indicated Huh7 cells. GAPDH served as loading control.

(b). The growth of indicated Huh7 cells was performed by using MTT assay.

(c,d). The wound-healing assay (c) and transwell assay (d) of Huh7 cells infected with lentivirus. The invasion assay was measured with Matrigel-coated transwell experiments. Scale bars, 100  $\mu$ m.

(e). The colonies of indicated Huh7 cells were counted and compared with that of scrambled.



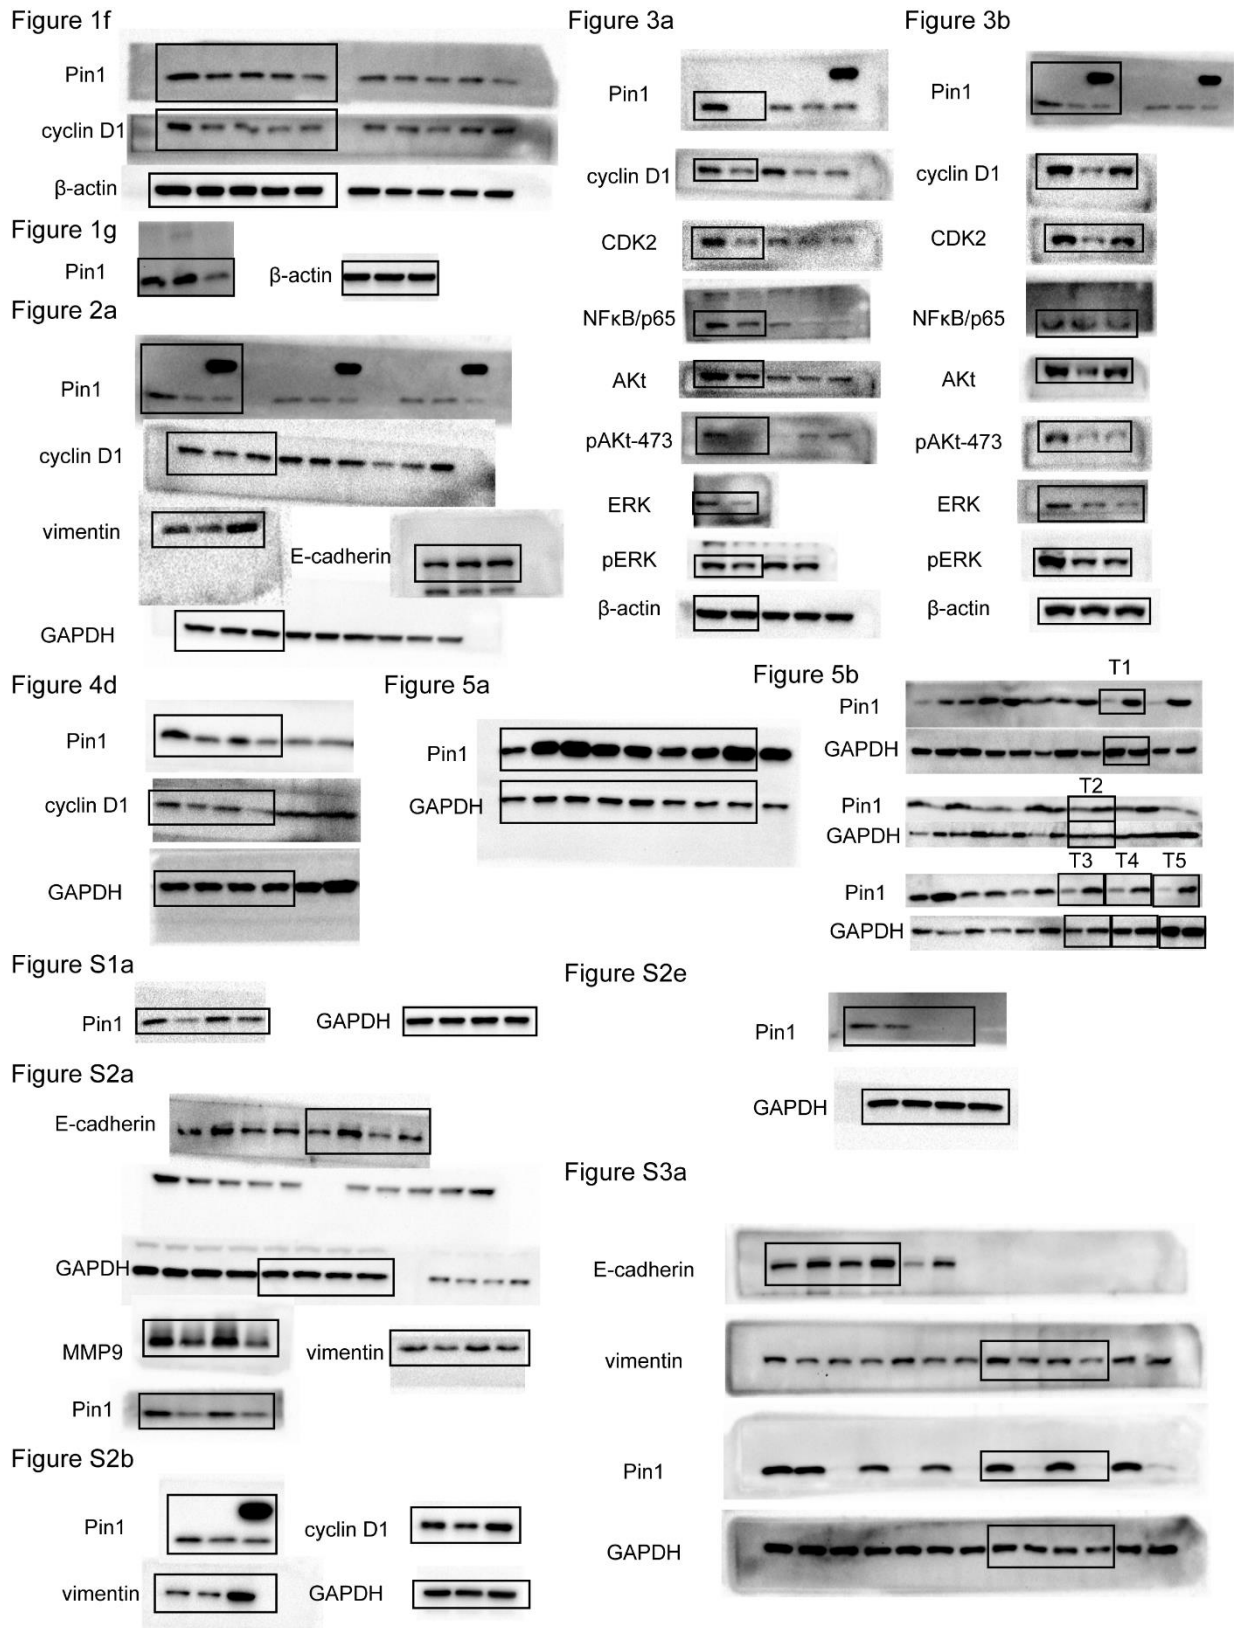

**Figure S4. Uncropped images for the key experiments in the main figure.**
